# Supplementary material for: Green Restaurants ASSessment (GRASS): A Tool for Evaluation and Classification of Restaurants Considering Sustainability Indicators
Source: MDPI journal article supplement (doi:10.3390/su131910928), 2021-09-30
Supplement: s1 [file s1]

Archive with 1 entries (1 files):
- sustainability-1375169-supplementary.pdf
