# Supplementary material for: Green Restaurants ASSessment (GRASS): A Tool for Evaluation and Classification of Restaurants Considering Sustainability Indicators
Source: MDPI journal article supplement (doi:10.3390/su131910928), 2021-09-30
Supplement: s1 [file s1 › sustainability-1375169-supplementary.pdf]

## ***Supplementary Material***

**Table S1.** The final version of the checklist that assesses sustainability in foodservice and its classification scores.

| <b>Checklist</b><br>Mark the answer to each question with X (Y=Yes / N=No)<br>(*) Na = Not applicable    Obs. Observation                                                                                    |          |          |            |            |
|--------------------------------------------------------------------------------------------------------------------------------------------------------------------------------------------------------------|----------|----------|------------|------------|
| <b>SUSTAINABILITY ASSESSMENT OF FOOD SERVICES</b>                                                                                                                                                            |          |          |            |            |
| <b>1. WATER, ENERGY AND GAS SUPPLY</b>                                                                                                                                                                       | <b>Y</b> | <b>N</b> | <b>Na*</b> | <b>Obs</b> |
| 1.1 The company has goals for the rational use of water, such as the use limit per activity (for example: for each meal served, 10 liters of water are spent).                                               |          |          |            |            |
| 1.2 The company has reduced at least 15% in the last six months, or in the previous 12 months, 30% of water consumption, being monitored by the record (see history of water bills).                         |          |          |            |            |
| 1.3 The company performs preventive maintenance of the plumbing.                                                                                                                                             |          |          |            |            |
| 1.4 The company, in case of a water leak, performs immediate repair.                                                                                                                                         |          |          |            |            |
| 1.5 Employees verify that taps, when not in use and at the end of the service, are closed (Note: confirm with the employee).                                                                                 |          |          |            |            |
| 1.6 The pressure of kitchen faucets, washbasins, and bathrooms is regulated and limited to allow water savings.                                                                                              |          |          |            |            |
| 1.7 Taps installed in hand or kitchen sinks have automatic activation.                                                                                                                                       |          |          |            |            |
| 1.8 The water reservoir is or is adequately kept covered and conserved that is free from cracks, leaks, infiltrations, peeling, and other defects.                                                           |          |          |            |            |
| 1.9 The company does not use running water to melt ice in sinks or thaw food.                                                                                                                                |          |          |            |            |
| 1.10 Employees remove dirt without water from utensils before putting them in the washing machine.                                                                                                           |          |          |            |            |
| 1.11 Dishwashers are operated only at full loading capacity.                                                                                                                                                 |          |          |            |            |
| 1.12 When cleaning floors, the water flow is interrupted when it is not necessary to use it.                                                                                                                 |          |          |            |            |
| 1.13 Rainwater is collected and /or water from thermal counters that use water is recycled for use in activities where the use of drinking water is not required (e.g., flushing, washing outside areas).    |          |          |            |            |
| 1.14 The company has documentation for the assessment and /or inspection of energy use for energy conservation.                                                                                              |          |          |            |            |
| 1.15 The company has reduced at least 15% in the last six months, or 30% in the previous 12 months (see history of energy expenditure).                                                                      |          |          |            |            |
| 1.16 The company has smart energy meters. Check the energy meter.                                                                                                                                            |          |          |            |            |
| 1.17 The refrigerator and freezer doors have audible alarms for open doors or automatic locks.                                                                                                               |          |          |            |            |
| 1.18 The temperature of refrigerators, cooling chambers, and freezers are adequate and have a monitoring record.                                                                                             |          |          |            |            |
| 1.19 The company performs and documents the maintenance recommended by the manufacturer for electronic devices to ensure that all equipment is functioning correctly and maintains energy efficiency levels. |          |          |            |            |
| 1.20 The company cleans the air cooler filters with suitable detergents or contracts a third-party company for this service and changes the replaceable filters according to the manufacturer's guidelines.  |          |          |            |            |

## Supplementary Material

|                                                                                                                                                                                                                                                |          |          |            |            |
|------------------------------------------------------------------------------------------------------------------------------------------------------------------------------------------------------------------------------------------------|----------|----------|------------|------------|
| 1.21 The company has lighting controls, such as sensors, timers, in low-occupancy areas (for example, in the distribution area) so that lights are automatically turned off when daylight is sufficient or when spaces are not being occupied. |          |          |            |            |
| 1.22 The company uses some form of renewable energy (wind, solar, or photovoltaic) in the production area.                                                                                                                                     |          |          |            |            |
| 1.23 The company achieves zero greenhouse gas emissions with proven partnerships (e.g., commercial energy and vehicle fuel use).                                                                                                               |          |          |            |            |
| 1.24 The company has a documented program to reduce carbon emissions (by at least 5% per year).                                                                                                                                                |          |          |            |            |
| 1.25 The company has documented targets for reducing the use of liquefied petroleum gas.                                                                                                                                                       |          |          |            |            |
| 1.26 The company has documented targets for reducing the use of natural gas.                                                                                                                                                                   |          |          |            |            |
| 1.27. The company uses biogas.                                                                                                                                                                                                                 |          |          |            |            |
| <b>2. MENU AND FOOD WASTE</b>                                                                                                                                                                                                                  | <b>Y</b> | <b>N</b> | <b>Na*</b> | <b>Obs</b> |
| 2.1 The company owns and uses the technical preparation sheets to make the preparations.                                                                                                                                                       |          |          |            |            |
| 2.2 The company has options for smaller portions separately or a children's menu.                                                                                                                                                              |          |          |            |            |
| 2.3 The company offers $\geq 50\%$ of its proven healthiest preparations.                                                                                                                                                                      |          |          |            |            |
| 2.4 The company offers a separate menu or substitutions to meet diet restrictions, such as gluten-free preparations, vegetarian cuisine, vegan menu, or preparations to meet religious restrictions.                                           |          |          |            |            |
| 2.5 The company has documented commitments, with a defined term, to reduce the use of sugar, salt, or saturated fat on the menu.                                                                                                               |          |          |            |            |
| 2.6 The company includes seasonal products in its menu, changing it throughout the months of the year.                                                                                                                                         |          |          |            |            |
| 2.7 At least 50% of the fruits and vegetables that the company buys are certified organic.                                                                                                                                                     |          |          |            |            |
| 2.8 The company manages its vegetable garden without using pesticides.                                                                                                                                                                         |          |          |            |            |
| 2.9 Suppliers of products of animal origin have certificates that prove that animals are raised without the application of antibiotics or organics.                                                                                            |          |          |            |            |
| 2.10 The company only purchases products of animal origin that have an animal welfare certification seal.                                                                                                                                      |          |          |            |            |
| 2.11 The company has a policy of purchasing sustainable seafood.                                                                                                                                                                               |          |          |            |            |
| 2.12 The company's supplier produces farmed fish and has a sustainability certification (for example, organic).                                                                                                                                |          |          |            |            |
| 2.13 The company does not use ingredients or products with transgenic ingredients in its composition in the production of meals.                                                                                                               |          |          |            |            |
| 2.14 The company prioritizes the full use of food, producing safe preparations that use peels, stalks, and /or edible shavings of vegetables and fruits as ingredients.                                                                        |          |          |            |            |
| 2.15 The company assesses your food waste during food preparation.                                                                                                                                                                             |          |          |            |            |
| 2.16 The company assesses its food waste during food distribution.                                                                                                                                                                             |          |          |            |            |
| 2.17 The company discards food waste in the form of composting, anaerobic digestion, maceration, donates to feed pigs, or establishes partnerships with cooperatives that carry out these processes.                                           |          |          |            |            |
| 2.18 The company trains its employees to avoid food waste during all stages of meal production, from the receipt of food to distribution.                                                                                                      |          |          |            |            |
| 2.19 The company carries out smart ordering systems, inventory monitoring, inventory rotation and /or other inventory management strategies to avoid food waste.                                                                               |          |          |            |            |
| 2.20 The company has goals for reducing/controlling food waste.                                                                                                                                                                                |          |          |            |            |

|                                                                                                                                                                                                   |          |          |            |            |
|---------------------------------------------------------------------------------------------------------------------------------------------------------------------------------------------------|----------|----------|------------|------------|
| 2.21 The company recycles or reuses its coffee grounds.                                                                                                                                           |          |          |            |            |
| 2.22 The company recycles cooking oil and /or transfers the cooking oil used to recycling companies.                                                                                              |          |          |            |            |
| <b>3. WASTE REDUCTION, CONSTRUCTION MATERIALS, CHEMICALS, EMPLOYEES AND SOCIAL SUSTAINABILITY</b>                                                                                                 | <b>Y</b> | <b>N</b> | <b>Na*</b> | <b>Obs</b> |
| 3.1 The company has an operational policy that contains a documented strategy on solid (non-food) waste management.                                                                               |          |          |            |            |
| 3.2 The company separates recyclable materials, that is, selective collection.                                                                                                                    |          |          |            |            |
| 3.3 The company limits packaging and orders products in bulk to avoid waste generation.                                                                                                           |          |          |            |            |
| 3.4 The company does not use disposables and /or adopts strategies to minimize the use of these materials as much as possible, with documented goals.                                             |          |          |            |            |
| 3.5 The company adopts strategies to reduce the use of plastic in the distribution of meals.                                                                                                      |          |          |            |            |
| 3.6 The company returns packaging boxes for suppliers to reuse and /or provides suppliers with their returnable boxes for the delivery of goods.                                                  |          |          |            |            |
| 3.7 The company returns glass bottles for suppliers to reuse and /or properly dispose of these materials for recycling.                                                                           |          |          |            |            |
| 3.8 The company adopts measures to encourage its customers to reduce waste (for example: maintaining glasses, reducing disposable packaging, eliminating plastics or straws, among others).       |          |          |            |            |
| 3.9 The company uses recycled paper or FSC certified office paper.                                                                                                                                |          |          |            |            |
| 3.10 The company uses lamps, accessories, or furniture made from recovered or recycled materials or those provided with an Environmental Product Declaration to improve the environmental impact. |          |          |            |            |
| 3.11 The paints used for building are environmentally sustainable.                                                                                                                                |          |          |            |            |
| 3.12 The furniture (tables, chairs, and others) of the company are made of durable materials that can be repaired.                                                                                |          |          |            |            |
| 3.13 The tablecloths (if any) and /or employees' uniforms are made of organic or environmentally sustainable materials.                                                                           |          |          |            |            |
| 3.14 The company uses rechargeable batteries for battery-powered devices and equipment, including flashlights, handheld vacuum cleaners, and others.                                              |          |          |            |            |
| 3.15 Office equipment replaced or purchased is ENERGY STAR, or PROCEL certified.                                                                                                                  |          |          |            |            |
| 3.16 The company uses only ecological cleaning products.                                                                                                                                          |          |          |            |            |
| 3.17 The company uses cleaning concentrates and dilution control systems and /or employee training and monitoring for adequate dilution to minimize the use of chemicals.                         |          |          |            |            |
| 3.18 The company exclusively uses environmentally sustainable hand cleaners in the bathrooms of customers and employees.                                                                          |          |          |            |            |
| 3.19 The team has already undergone environmental training (energy efficiency and water efficiency).                                                                                              |          |          |            |            |
| 3.20 The team has already undergone environmental training (fundamentals of sustainability).                                                                                                      |          |          |            |            |
| 3.21 The staff has undergone some training on healthy eating and the health impact of what they are producing.                                                                                    |          |          |            |            |
| 3.22 The company has a strategy regarding donations or support to its community.                                                                                                                  |          |          |            |            |
| 3.23 The company donates to food banks or charities to avoid wasting food from products suitable for consumption.                                                                                 |          |          |            |            |
| 3.24 The company has initiatives to promote healthy eating education for the local community (schools, colleges, community groups).                                                               |          |          |            |            |
| 3.25 The company has a policy, with the supplier or purchase specification in place that favors the acquisition of local products for foods such as dairy products, meat, fruits, and vegetables. |          |          |            |            |

## Supplementary Material

|                                                                                                                                                                                                                                   |              |  |  |  |
|-----------------------------------------------------------------------------------------------------------------------------------------------------------------------------------------------------------------------------------|--------------|--|--|--|
| 3.26 Does the company purchase one or more products from a charitable foundation or a social enterprise that provides social impact? (For example, product made from leftover food, bread from a social enterprise bakery, etc.). |              |  |  |  |
| <b>Classification</b>                                                                                                                                                                                                             | <b>Score</b> |  |  |  |
| Restaurants with low adherence to sustainable practices or red seal                                                                                                                                                               | 0 to 40%     |  |  |  |
| Restaurants with medium adherence to sustainable practices or yellow seal                                                                                                                                                         | 40%> to <75% |  |  |  |
| Restaurants with good adherence to sustainable practices or seal green                                                                                                                                                            | ≥75%         |  |  |  |
